# Supplementary material
Source: PubMed Central journal article supplement (PMC6820809)
Supplement: EMS84620-supplement-Supplemental_Video_Legends.pdf [file EMS84620-supplement-Supplemental_Video_Legends.pdf]

1 ***Supplemental videos***

2 **Video 1. Naïve Flot1<sup>-/-</sup> and WT OT-I T cells migrating in popliteal LN.** Scale 20 μm; Time in min:s.

3 **Video 2. Memory Flot1<sup>-/-</sup> and WT OT-I T cells migrating in popliteal LN.** Scale 20 μm; Time in min:s.

4 **Video 3. Memory Flot1<sup>-/-</sup> and WT OT-I T cells migrating in the epidermis.** Scale 50 μm; Time in

5 h:min:s.
